# Supplementary material
Source: publisher site journal article supplement (https://www.dovepress.com/article/232010)
Supplement: Supplementary file 1 [file get_supplementary_file.php]

**Table S1** Primers used in the study.

| Genes                        | Primer sequence (5' 3')   | Annealing temperature (°C) | Amplicon size (bp) |
|------------------------------|---------------------------|----------------------------|--------------------|
| <i>bla<sub>KPC</sub></i>     | F: GCTACACCTAGCTCCACCTTC  | 52                         | 1050               |
|                              | R: TCAGTGCTCTACAGAAAACC   |                            |                    |
| <i>bla<sub>NDM</sub></i>     | F: GGTTTGGCGATCTGGTTTTTC  | 52                         | 621                |
|                              | R: CGGAATGGCTCACGATC      |                            |                    |
| <i>bla<sub>IMP</sub></i>     | F: CATGGTTTGGTGGTTCTTGT   | 50                         | 488                |
|                              | R: ATAATTTGGCGGACTTTGGC   |                            |                    |
| <i>bla<sub>VIM</sub></i>     | F: GATGGTGTTTGGTCGCATA    | 58                         | 390                |
|                              | R: CGAATGCGCAGCACCAG      |                            |                    |
| <i>bla<sub>OXA-48</sub></i>  | F: TTGGTGGCATCGATTATCGG   | 58                         | 744                |
|                              | R: GAGCACTTCTTTTGTGATGGC  |                            |                    |
| <i>bla<sub>CTX-M-1</sub></i> | F: AAAAATCACTGCGTCAGTTCAC | 55                         | 867                |
|                              | R: ACAAACCGTTGGTGACGATT   |                            |                    |
| <i>bla<sub>CTX-M-9</sub></i> | F: TAT TGGGAGTTTGAGATGGT  | 50                         | 933                |
|                              | R: TCCTTCAACTCA GCAAAAGT  |                            |                    |
| <i>bla<sub>SHV</sub></i>     | F: AGCCGCTTGAGCAAATTAAC   | 60                         | 713                |
|                              | R: ATCCCGCAGATAAATCACCAC  |                            |                    |
| <i>bla<sub>TEM</sub></i>     | F: CATTTCCGTGTCGCCCTTATTC | 60                         | 800                |
|                              | R: CGTTCATCCATAGTTGCCTGAC |                            |                    |
| <i>ompC</i>                  | F: GAGAATGGACTTGCCGACTG   | 55                         | 1289               |
|                              | R: CGAACGGTCGCAAGAGTA     |                            |                    |
| <i>ompF</i>                  | F: CAGAACTTATTGACGGCAG    | 55                         | 1410               |
|                              | R: CGGGACGTTTCATCGGCAC    |                            |                    |
| <i>fosA3</i>                 | F: CGGGAGGAAAAGTCATGCTG   | 51                         | 209                |
|                              | R: ATAGTCGCTTTCCTGAGGGG   |                            |                    |
| <i>fosA</i>                  | F: CAAGTGAATAAAGGCGCTT    | 56                         | 241                |
|                              | R: ACCTACATGAACCTCCAAC    |                            |                    |
| <i>mcr-1</i>                 | F: GCTCGGTCAGTCCGTTTG     | 56                         | 1626               |
|                              | R: GAATGCGGTGCGGTCTTT     |                            |                    |

R: AATGGAGATCCCCGTTTTT

---

**Table S2** mCIM results for isolates tested in our study<sup>1</sup>

| Isolates | mCIM zone diameter (mm) | mCIM result <sup>2</sup> |
|----------|-------------------------|--------------------------|
| DC-38    | 19                      | Neg <sup>3</sup>         |
| DC-269   | 21                      | Neg                      |
| DC-1918  | 19                      | Neg                      |
| DC-1960  | 20                      | Neg                      |
| DC-2003  | 21                      | Neg                      |
| DC-3285  | 6                       | Pos <sup>4</sup>         |
| DC-3737  | 6                       | Pos                      |
| DC-3835  | 6                       | Pos                      |
| DC-3938  | 21                      | Neg                      |
| DC-4069  | 6                       | Pos                      |
| DC-4385  | 6                       | Pos                      |
| DC-4852  | 20                      | Neg                      |
| DC-4967  | 6                       | Pos                      |
| DC-5108  | 6                       | Pos                      |
| DC-5113  | 6                       | Pos                      |
| DC-5114  | 6                       | Pos                      |
| DC-5127  | 22                      | Neg                      |
| DC-5128  | 6                       | Pos                      |
| DC-5147  | 6                       | Pos                      |
| DC-5178  | 22                      | Neg                      |
| DC-5183  | 6                       | Pos                      |
| DC-5208  | 19                      | Neg                      |
| DC-6525  | 20                      | Neg                      |
| DC-6581  | 6                       | Pos                      |
| DC-6669  | 20                      | Neg                      |
| DC-6729  | 6                       | Pos                      |
| DC-6824  | 6                       | Pos                      |
| DC-6834  | 22                      | Neg                      |
| DC-6856  | 6                       | Pos                      |
| DC-6896  | 6                       | Pos                      |
| DC-6899  | 6                       | Pos                      |

|         |    |     |
|---------|----|-----|
| DC-6911 | 6  | Pos |
| DC-7114 | 6  | Pos |
| DC-7143 | 6  | Pos |
| DC-7157 | 6  | Pos |
| DC-7333 | 6  | Pos |
| DC-7350 | 6  | Pos |
| DC-7368 | 6  | Pos |
| DC-7523 | 6  | Pos |
| DC-7603 | 19 | Neg |
| DC-7658 | 6  | Pos |
| DC-7663 | 6  | Pos |
| DC-7683 | 6  | Pos |
| DC-7706 | 6  | Pos |
| DC-7741 | 6  | Pos |
| DC-7781 | 6  | Pos |
| DC-7782 | 6  | Pos |
| DC-7828 | 6  | Pos |
| DC-7911 | 6  | Pos |
| DC-7914 | 6  | Pos |
| DC-7956 | 6  | Pos |
| DC-7969 | 6  | Pos |
| DC-7980 | 6  | Pos |
| DC-7994 | 21 | Neg |
| DC-8085 | 6  | Pos |
| DC-8087 | 6  | Pos |
| DC-8111 | 6  | Pos |
| DC-8234 | 6  | Pos |

<sup>1</sup>mCIM, modified carbapenem inactivation method; <sup>2</sup>mCIM result, Results were interpreted as positive when the zone diameter of 6-15 mm or presence of pinpoint colonies within a 16-18 mm zone. If the zone of inhibition was 19 mm or more the isolate was determined to be carbapenemase negative. For isolates with a zone size of 16-18 mm the carbapenemase status was recorded as indeterminate; <sup>2</sup>Neg, negative; <sup>3</sup>Pos, positive.

## Figure legend

**Figure S1** Modified carbapenem inactivation method (mCIM) for phenotypic detection of carbapenemase production among the analyzed isolates. A positive control (*Klebsiella pneumoniae* ATCC BAA-1705) and a negative control (*Klebsiella pneumoniae* ATCC BAA-1706) were tested in parallel. Results were interpreted as positive when the zone diameter of 6-15 mm or presence of pinpoint colonies within a 16-18 mm zone. If the zone of inhibition was 19 mm or more the isolate was determined to be carbapenemase negative. For isolates with a zone size of 16-18 mm the carbapenemase status was recorded as indeterminate.



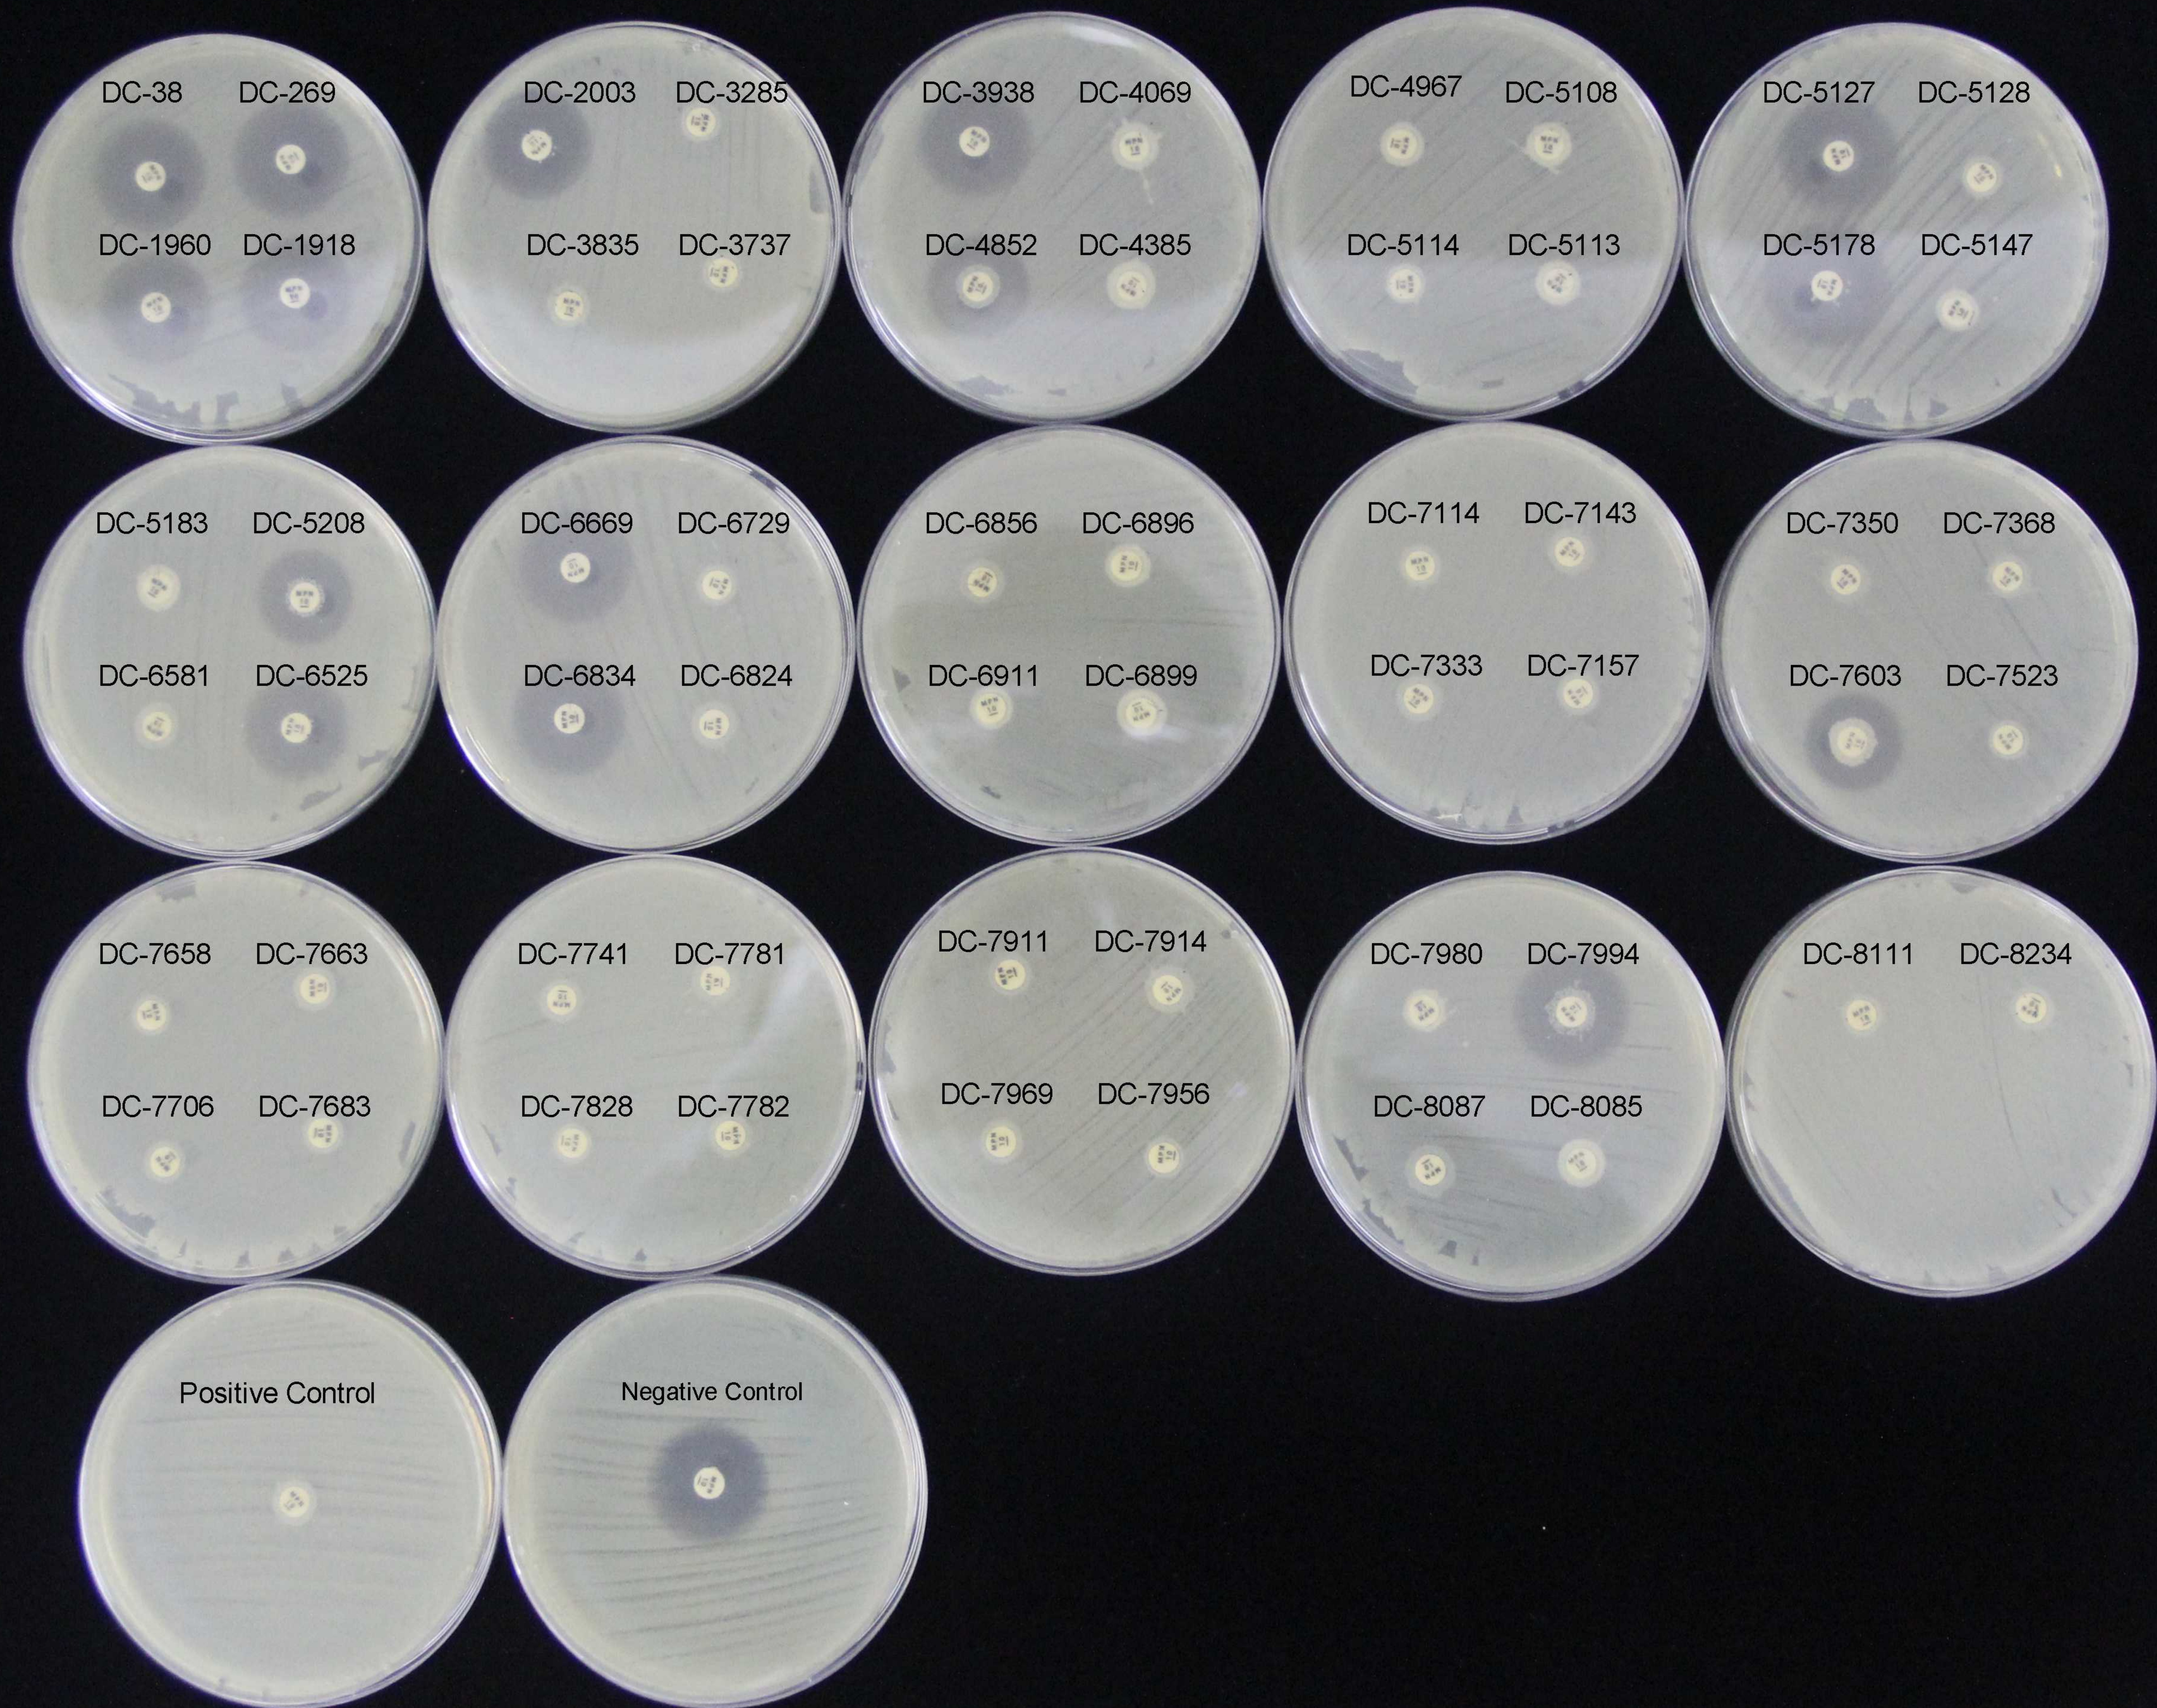

DC-38 DC-269

DC-2003 DC-3285

DC-3938 DC-4069

DC-4967 DC-5108

DC-5127 DC-5128

DC-1960 DC-1918

DC-3835 DC-3737

DC-4852 DC-4385

DC-5114 DC-5113

DC-5178 DC-5147

DC-5183 DC-5208

DC-6669 DC-6729

DC-6856 DC-6896

DC-7114 DC-7143

DC-7350 DC-7368

DC-6581 DC-6525

DC-6834 DC-6824

DC-6911 DC-6899

DC-7333 DC-7157

DC-7603 DC-7523

DC-7658 DC-7663

DC-7741 DC-7781

DC-7911 DC-7914

DC-7980 DC-7994

DC-8111 DC-8234

DC-7706 DC-7683

DC-7828 DC-7782

DC-7969 DC-7956

DC-8087 DC-8085

Positive Control

Negative Control
